# Supplementary material
Source: PubMed Central journal article supplement (PMC4653685)
Supplement: 10.1074_M115.685511_jbc.M115.685511-1.pdf [file 10.1074_M115.685511_jbc.M115.685511-1.pdf]

# Supplementary Figure 1

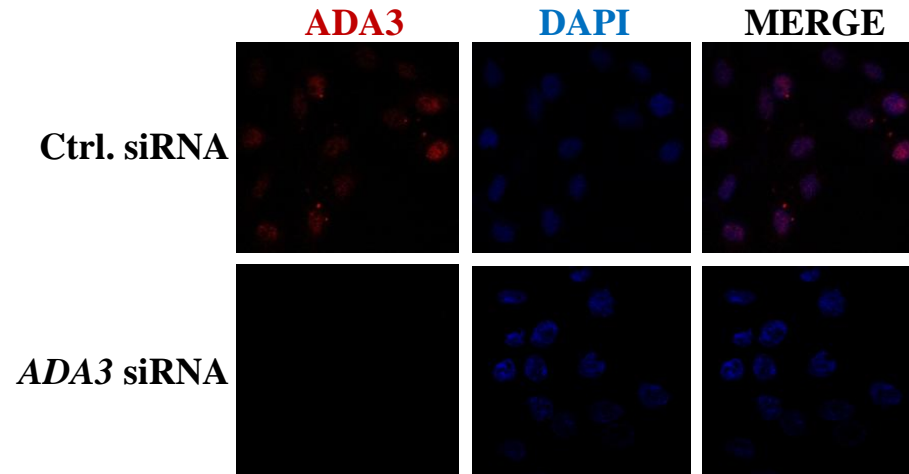

**Supplementary Figure S1.** 76NTERT cells were transfected either with control or *ADA3* siRNA. 48 h after transfection, cells were fixed with 4% paraformaldehyde and stained with anti-*ADA3* antibody. Cells were then mounted on DAPI containing mounting media and visualized under confocal microscope.
